# Supplementary material for: Enhancing acidic hydrogen evolution through pyrrolic nitrogen-doped reduced graphene oxide triggering two-electron oxygen reduction
Source: Royal Society of Chemistry journal article supplement (doi:10.1039/d4qi01187b), 2024-01-01
Supplement: d4qi01187b1.pdf [file d4qi01187b1.pdf]

## Electronic Supplementary Information

### Enhancing Acidic Hydrogen Evolution through Pyrrolic Nitrogen-Doped Reduced Graphene Oxide Triggering Two-Electron Oxygen Reduction

Zhiqiang Hou,<sup>a,‡</sup> Hui Jiang,<sup>a,‡</sup> Yanru Guo,<sup>a</sup> Kejing Huang,<sup>b,\*</sup> Fei Zhao,<sup>a</sup> Yongyan Xu,<sup>a</sup>

Peng Peng,<sup>a</sup> Shiyu Zou<sup>a,\*</sup>, Jianjun Yan,<sup>c</sup> Junjun Zhang<sup>d,\*</sup>

<sup>a</sup> *School of Chemistry and Chemical Engineering, Zhou Kou Normal University, Henan, 466001, P. R. China.*

<sup>b</sup> *Education Department of Guangxi Zhuang Autonomous Region, Laboratory of Optic-electric Chemo/Biosensing and Molecular Recognition, Guangxi Collaborative Innovation Center for Chemistry and Engineering of Forest Products, Guangxi Key Laboratory of Chemistry and Engineering of Forest Products, Key Laboratory of Chemistry and Engineering of Forest Products, State Ethnic Affairs Commission, School of Chemistry and Chemical Engineering, Guangxi Minzu University, Nanning 530006, China.*

<sup>c</sup> *Journal of Zhou Kou Normal University Editorial Department, Zhou Kou Normal University, Henan, 466001, P. R. China.*

<sup>d</sup> *State Key Laboratory of High-Efficiency Utilization of Coal and Green Chemical Engineering, College of Chemistry & Chemical Engineering, Ningxia University, Yinchuan 750021, Ningxia, P.R. China.*

[\*] Corresponding author.

E-mail address: kejinghuang@163.com (K.J. Huang); shiyu\_zou@sina.com (S.Y.

Zou); zhangjj089@nxu.edu.cn (J.J. Zhang)

[<sup>‡</sup>] These authors contributed equally to this work.

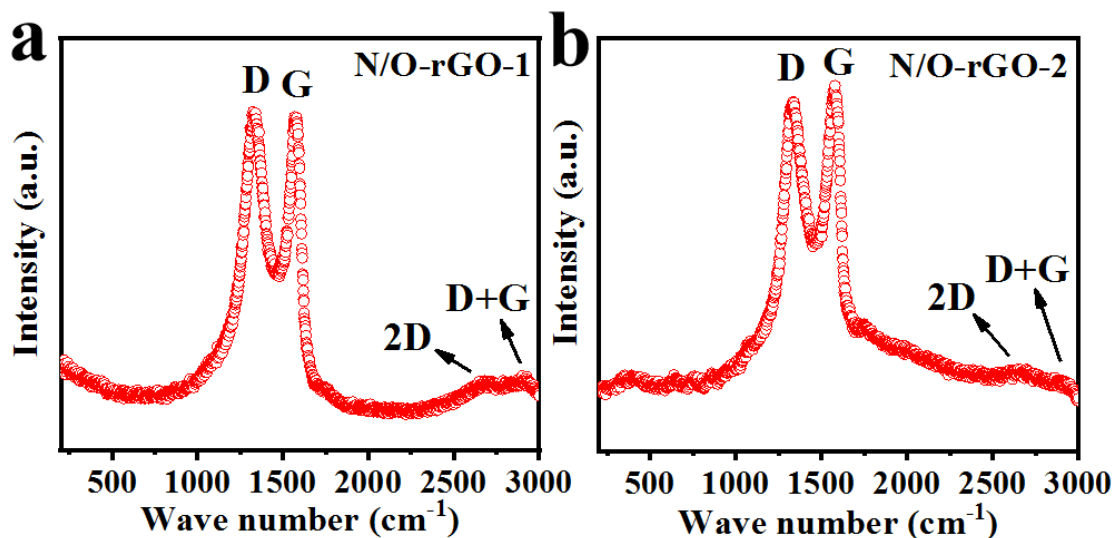

Fig. S1 Raman spectra of (a) N/O-rGO-1 and (b) N/O-rGO-2.

Document: 2024014 (varioELcube) from: --.-- (modified)

analyticfunctional testing  
vario E Lcube  
serial number: 19143037

Text report

| No. | Name             | N [%] | C [%] | N Area | C Area |
|-----|------------------|-------|-------|--------|--------|
| 64  | mo-1 → N/O-rGO-1 | 0.57  | 74.36 | 101    | 26 230 |
| 65  | mo-2 → N/O-rGO-2 | 0.45  | 73.99 | 126    | 35 952 |

Document: Untitled (VarioMICRO) from: --.-- (modified)

LABCAS  
test by zhangjun  
serial number: 15061010

Text report

|    | Name             | O [%]  | O Area | Method   |
|----|------------------|--------|--------|----------|
| 43 | MO-2 → N/O-rGO-2 | 21.144 | 10 521 | Standard |
| 46 | MO-1 → N/O-rGO-1 | 17.959 | 8 282  | Standard |

Fig. S2 Elemental analysis tests for N/O-rGO-1 and N/O-rGO-2.

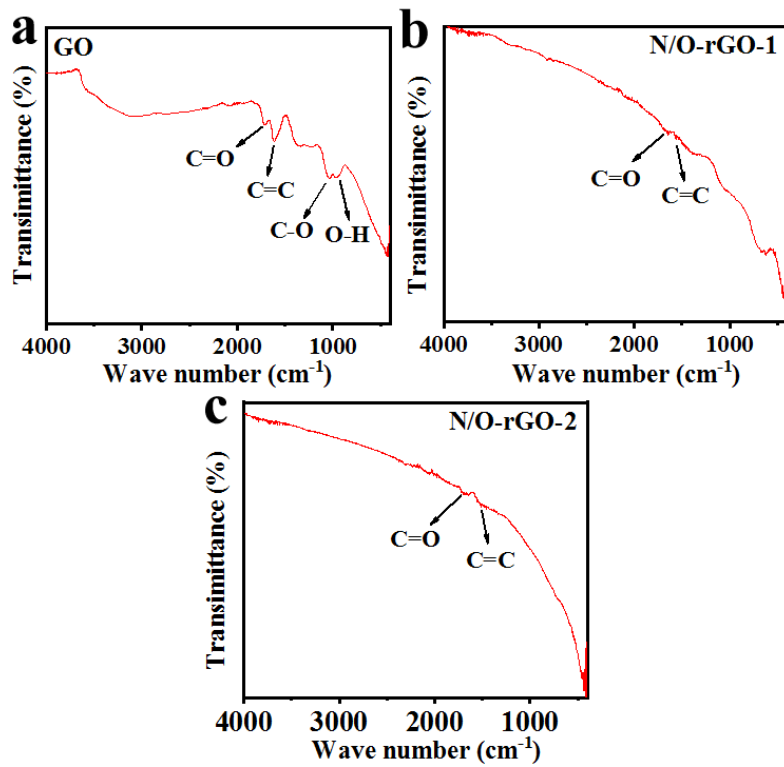

**Fig. S3** FTIR spectra of (a) GO, (b) N/O-rGO-1 and (c) N/O-rGO-2.

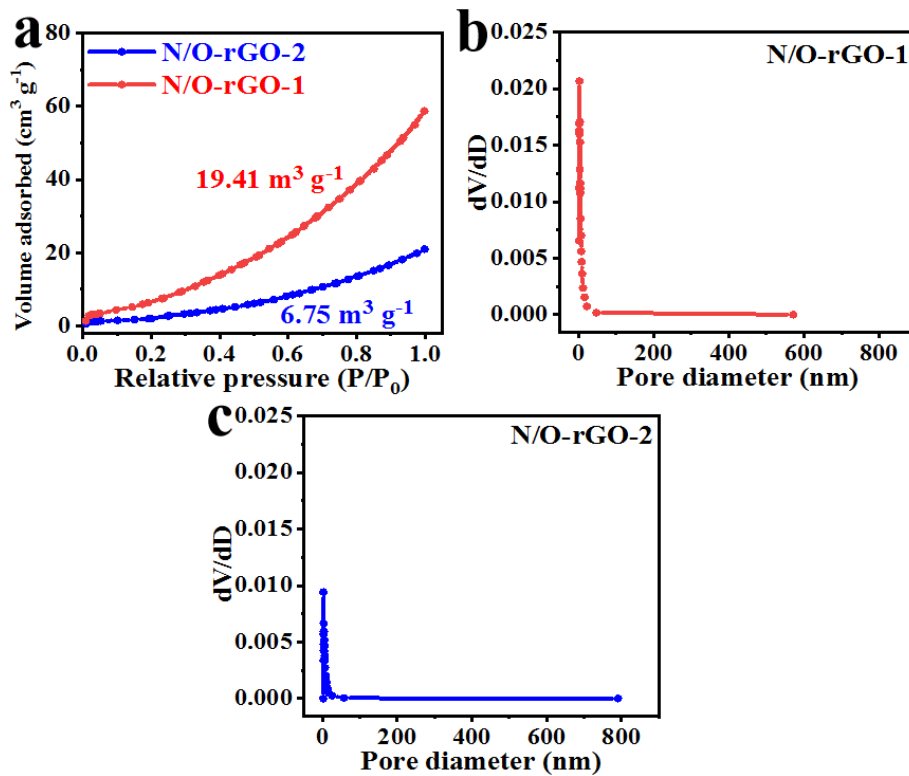

**Fig. S4** (a)  $N_2$  adsorption/desorption isotherms and pore size distribution of (b) N/O-rGO-1 and (c) N/O-rGO-2.

The specific surface areas and pore size distribution of N/O-rGO-1 and N/O-rGO-2 were analyzed using a BET analyzer, as depicted in Fig. S4. The N<sub>2</sub> adsorption and desorption curves of N/O-rGO-1 and N/O-rGO-2 exhibit type III isotherms (Fig. S4a). The analysis results suggest that N/O-rGO-1 has a higher BET specific surface area (19.41 m<sup>3</sup> g<sup>-1</sup>) than N/O-rGO-2, providing rich reactive active sites. Furthermore, N/O-rGO-1 also shows a much more micropore and mesopore structure compared to N/O-rGO-2 (Fig. S4b and S4c), which is beneficial for improving electrochemical performance [S1].

[S1] Y. F. Wang, S. J. Zou, W. P. Hu, F. F. Wu, J. X. Yang, Y. Y. Cen, D. X. Yang, Z. Q. Hou, K. J. Huang, Biomass-derived graphene-like carbon nanoflakes for advanced supercapacitor and hydrogen evolution reaction, *J. Alloy. Compd.*, 2022, **928**, 167176.

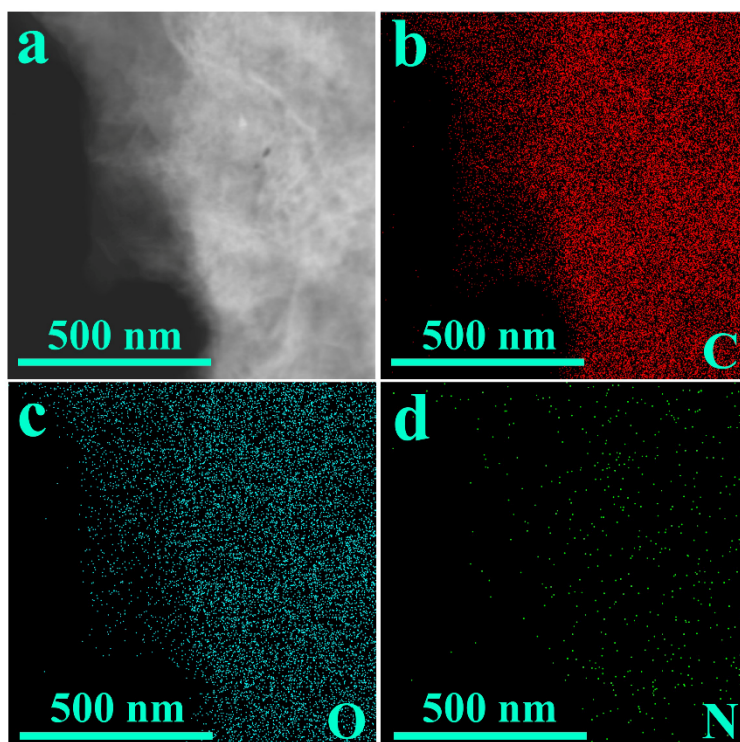

Fig. S5 EDS mapping test for N/O-rGO-1.

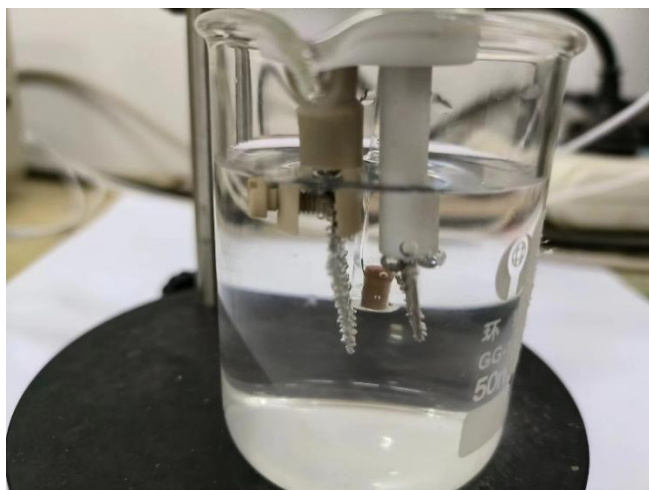

**Fig. S6** An electrolytic cell with close electrode spacing.

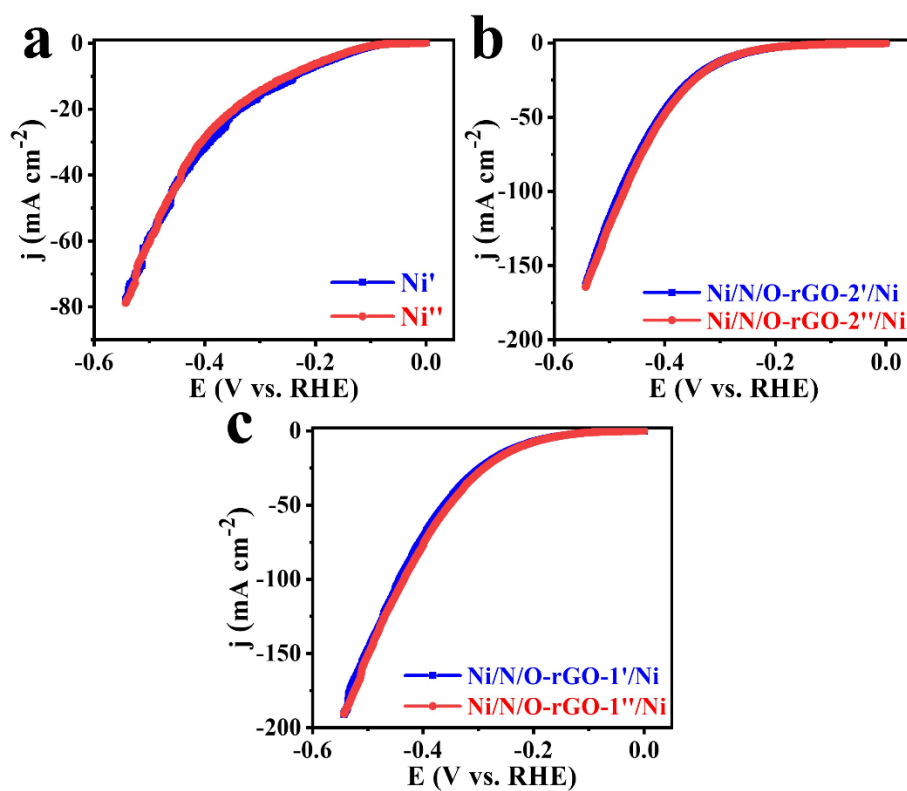

**Fig. S7** The duplicate LSV tests for (a) Ni, (b) Ni/N/O-rGO-2/Ni, and (c) Ni/N/O-rGO-1/Ni.

**Table S1** Comparison of Ni/N/O-rGO/Ni with previous related research of precursor, method to synthesis, crystalline phase, and catalyst efficiency.

| Catalyst                                               | Precursor                                                                                                        | Synthetic method                              | $\eta_{10}$ (mV) | Ref.      |
|--------------------------------------------------------|------------------------------------------------------------------------------------------------------------------|-----------------------------------------------|------------------|-----------|
| NiFe <sub>2</sub> O <sub>4</sub> @N-rGO-CC             | NiCl <sub>2</sub> ·6H <sub>2</sub> O, FeCl <sub>3</sub> ·6H <sub>2</sub> O, GO solution, et al                   | Hydrothermal and thermal treatment            | 188              | [S2]      |
| Mo <sub>2</sub> C/MoN/NG                               | Dicyandiamide and (NH <sub>4</sub> ) <sub>6</sub> Mo <sub>7</sub> O <sub>24</sub>                                | Thermal treatment                             | 78.82            | [S3]      |
| Fe <sub>1</sub> Co <sub>2</sub> Ni <sub>1</sub> P/VrGO | FeSO <sub>4</sub> ·7H <sub>2</sub> O, Ni(NO <sub>3</sub> ) <sub>2</sub> ·6H <sub>2</sub> O, et al                | Electroless plating                           | 139              | [S4]      |
| IrO <sub>2</sub> -RuO <sub>2</sub> /C                  | RuCl <sub>3</sub> ·xH <sub>2</sub> O, H <sub>2</sub> IrCl <sub>6</sub> ·6H <sub>2</sub> O, N-doped carbon, et al | Microwave treatment, thermal treatment, et al | 82               | [S5]      |
| A-NGO-Pt                                               | GO solution, H <sub>2</sub> PtCl <sub>6</sub> , et al                                                            | Hydrothermal and thermal treatment            | 59               | [S6]      |
| Ni/N/O-rGO-1/Ni                                        | GO solution                                                                                                      | Hydrothermal and thermal treatment            | 229              | This work |

[S2] K. Zhang, P. Jiang, Q. Gu, Y. Leng and P. Zhang, Design of a high-efficiency bifunctional electrocatalyst: Rich-nitrogen-doped reduced graphene oxide-modified carbon cloth-growing nickel-iron complex oxides for overall water splitting. *Energy Fuel*, 2022, **36**, 4911-4923.

[S3] J. Wang, W. Chen, T. Wang, N. Bate, C. Wang and E. Wang, A strategy for highly dispersed Mo<sub>2</sub>C/MoN hybrid nitrogen-doped graphene via ion-exchange resin synthesis for efficient electrocatalytic hydrogen reduction. *Nano Res.*, 2018, **11**, 4535-4548.

[S4] K. Guo, F. Shaik, J. Yang and B. Jing, Tuning the cationic ratio of Fe<sub>1</sub>Co<sub>x</sub>Ni<sub>y</sub>P

integrated on vertically aligned reduced graphene oxide array via electroless plating as efficient self-supported bifunctional electrocatalyst for water splitting.

*J. Electrochem. En. Conv. Stor.*, 2022, **19**, 021010(1-13).

[S5] R. Samanta, P. Panda, R. Mishra and S. Barman, IrO<sub>2</sub>-modified RuO<sub>2</sub> nanowires/nitrogen-doped carbon composite for effective overall water splitting in all pH. *Energy Fuel*, 2022, **36**, 1015–1026.

[S6] M. Saquib, A. Bharadwaj, H. S. Kushwaha and A. Halder, Chloride corrosion resistant nitrogen doped reduced graphene oxide/platinum electrocatalyst for hydrogen evolution reaction in an acidic medium. *ChemistrySelect*, 2020, **5**, 1739-1750.

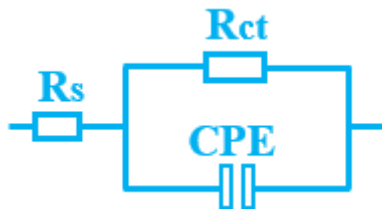

**Fig. S8** The fitted equivalent circuits of the Nyquist plots for Ni plate.

**Table S2** The parameter of Rs, Rct, CPE, and W for the Ni/N/O-rGO-1/Ni, Ni/N/O-rGO-2/Ni, and Ni plate electrode.

| Electrode       | Rs ( $\Omega$ ) | Rct   | CPE     | W      |
|-----------------|-----------------|-------|---------|--------|
| Ni/N/O-rGO-1/Ni | 0.759           | 1.845 | 0.00129 | 0.1804 |
| Ni/N/O-rGO-2/Ni | 0.760           | 2.498 | 0.00152 | 0.120  |
| Ni              | 1.291           | 20.55 | 0.0005  | -----  |



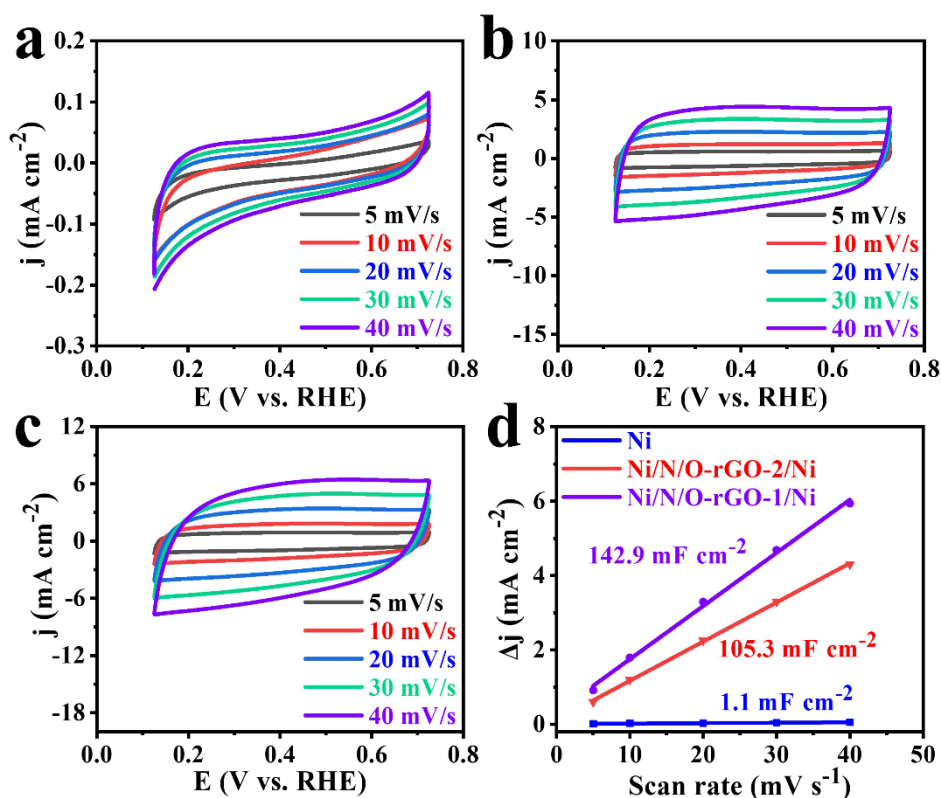

**Fig. S9** CV curves of (a) Ni, (b) Ni/N/O-rGO-2/Ni, and (c) Ni/N/O-rGO-1/Ni. (d) Plots of capacitive currents as a function of scan rate for Ni, Ni/N/O-rGO-2/Ni, and Ni/N/O-rGO-1/Ni.

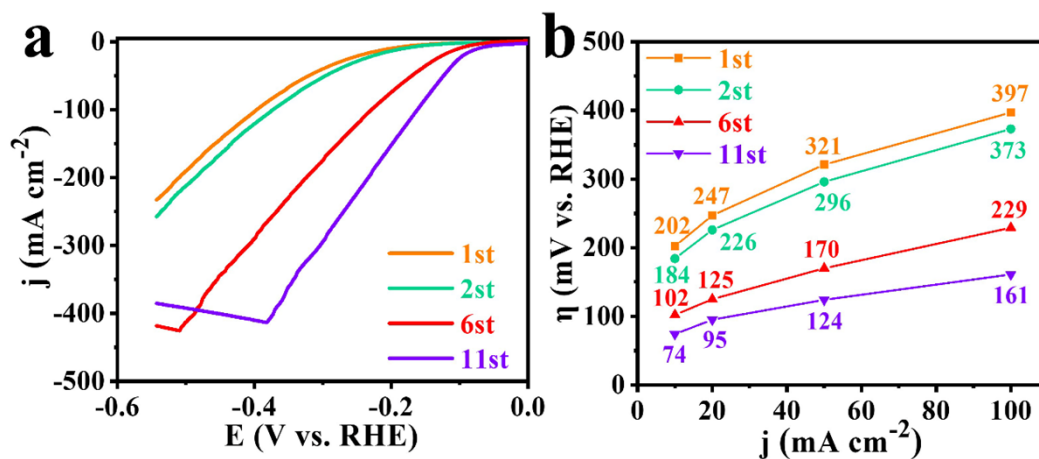

**Fig. S10** LCV curves of Ni/N/O-rGO-1/Ni after the 1st, 2nd, 6th, and 11th chronopotentiometry tests in a 275-hour electrocatalytic life.

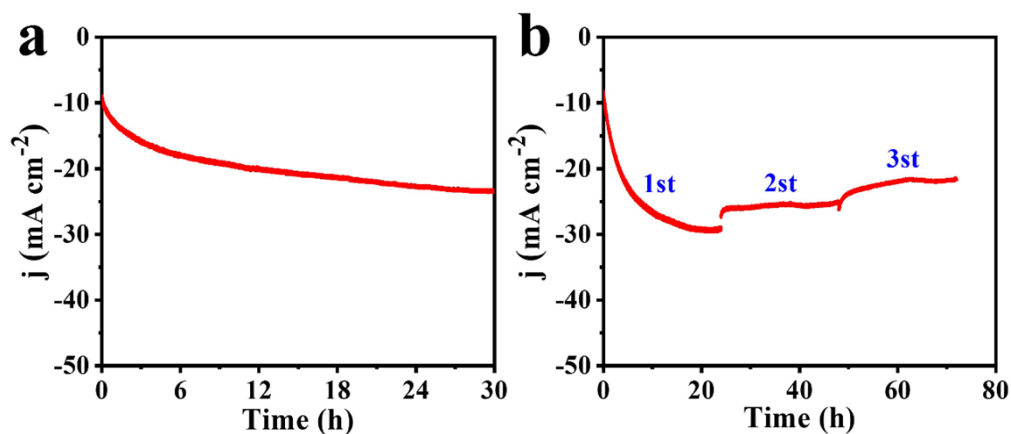

**Fig. S11** Chronopotentiometry of Ni/N/O-rGO-2/Ni and Ni.

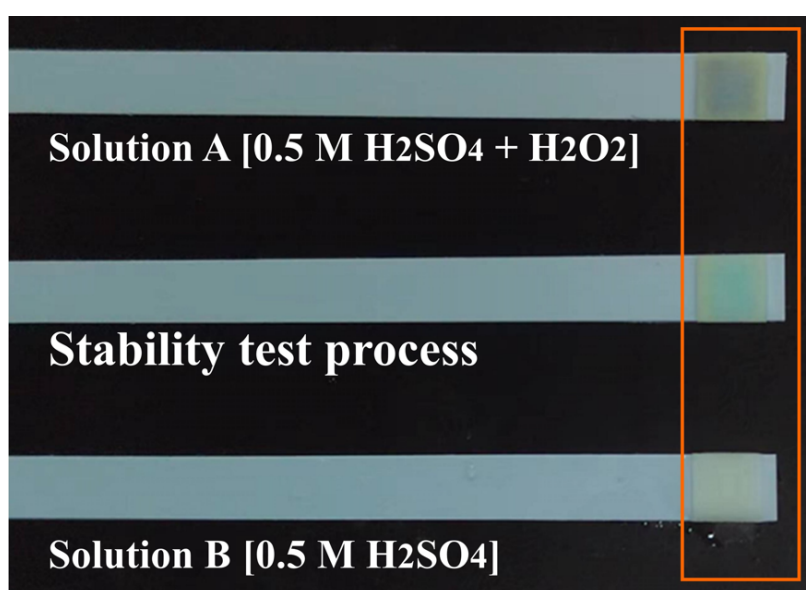

**Fig. S12** Verify the presence of  $\text{H}_2\text{O}_2$  species using the  $\text{H}_2\text{O}_2$  detection test paper.

We employed  $\text{H}_2\text{O}_2$  detection test papers (Zhejiang Lohand Environment Technology Co. Ltd, 1-100 mg/L) to determine the presence of  $\text{H}_2\text{O}_2$  species in the electrocatalysis durability assessment. Fig. S12 demonstrates that the colorimetric response of the test paper indicates the presence of  $\text{H}_2\text{O}_2$  throughout the stability assessment. In comparison, the detection test paper exhibits a darker hue compared to its appearance during the stability assessment, attributed to Solution A's higher  $\text{H}_2\text{O}_2$  concentration. Furthermore, the lack of color change in the detection test paper for

Solution B (0.5 M H<sub>2</sub>SO<sub>4</sub>) confirms H<sub>2</sub>O<sub>2</sub>'s absence.

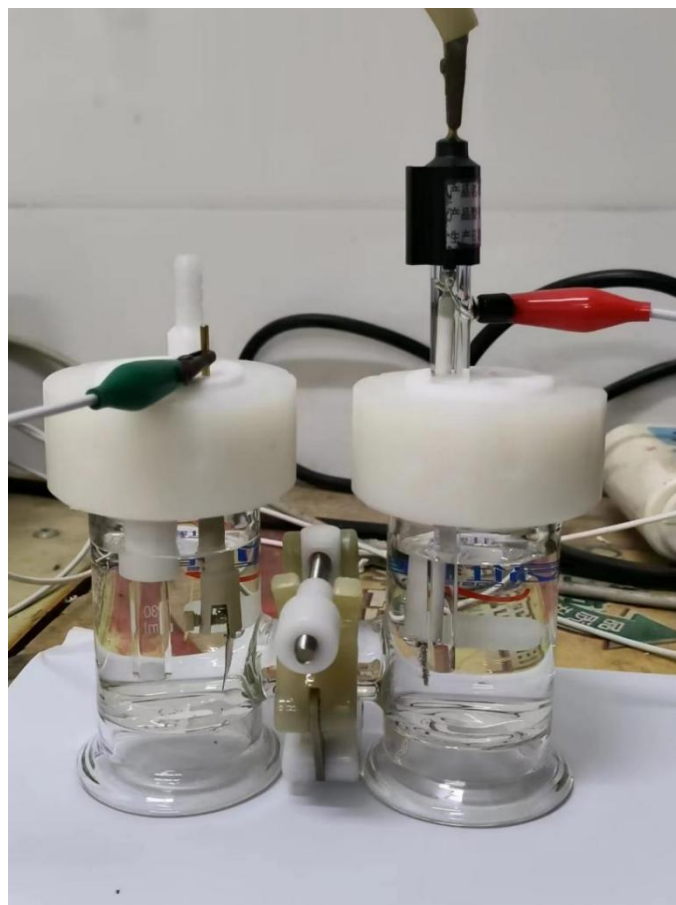

Fig. S13 An H-type electrolytic cell with a longer electrode spacing.

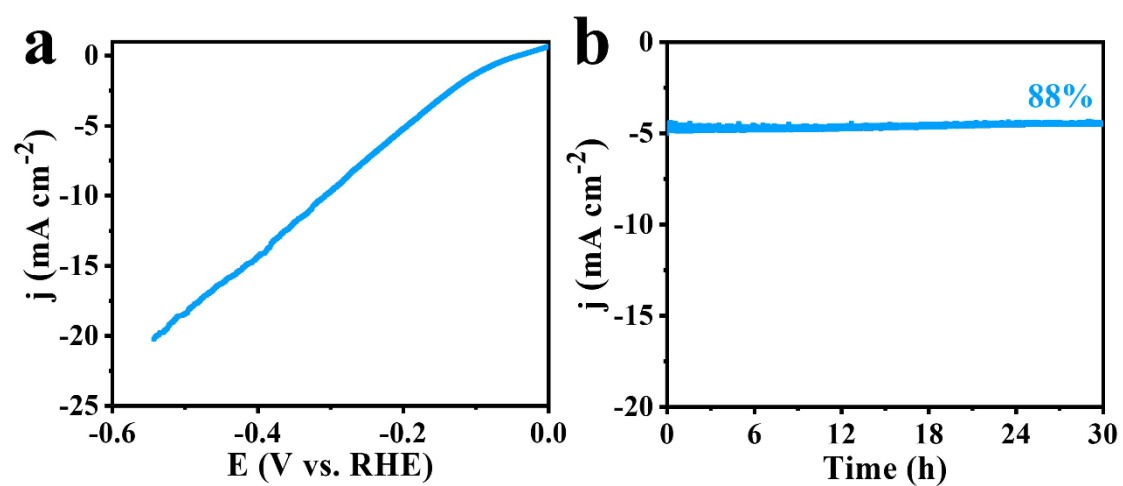

Fig. S14 LSV curves and chronopotentiometry of Ni/N/O-rGO-1/Ni using an H-type electrolytic cell.

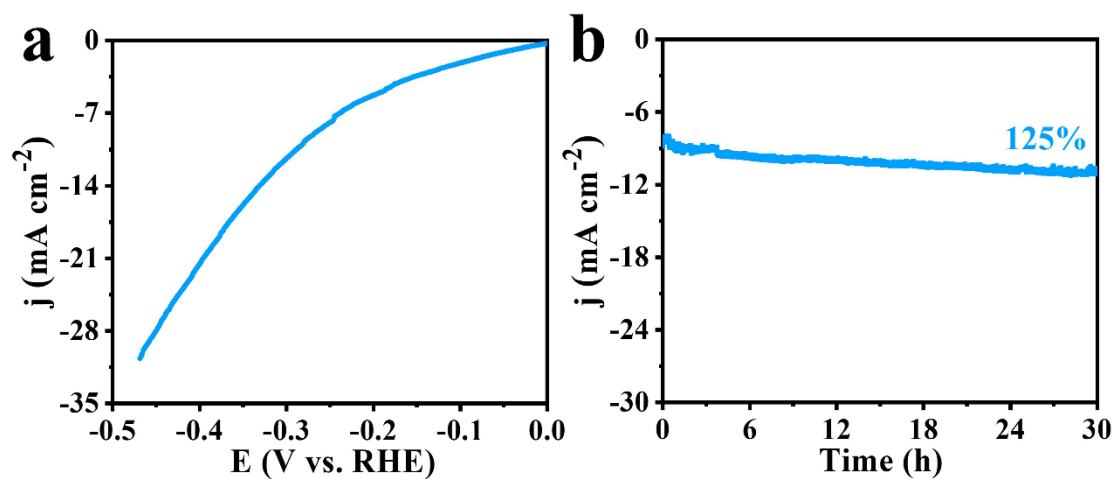

**Fig. S15** LSV curves and chronopotentiometry of Ni/N/O-rGO-1/Ni in 0.4 M H<sub>3</sub>PO<sub>4</sub> solution.

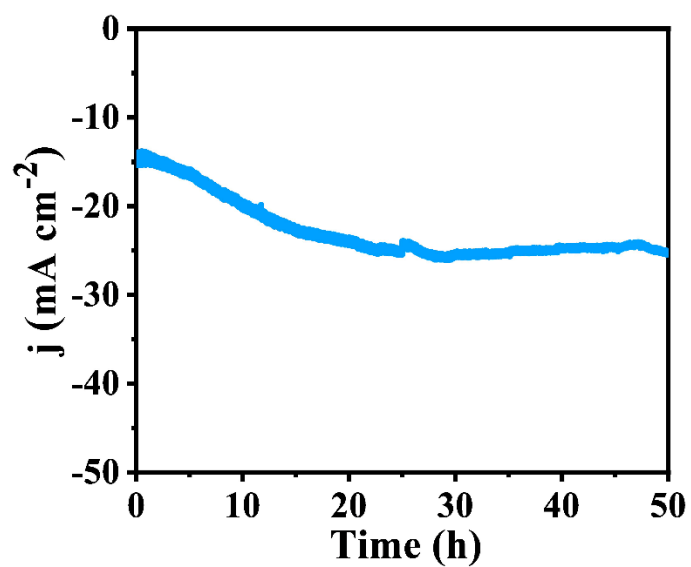

**Fig. S16** Chronopotentiometry of Ni/N/O-rGO-1/Ni in 0.5 M H<sub>2</sub>SO<sub>4</sub> solution at 20 °C.
